# Supplementary material
Source: MDPI journal article supplement (https://www.mdpi.com/2079-6412/12/12/1897)
Supplement: s1 [file s1]

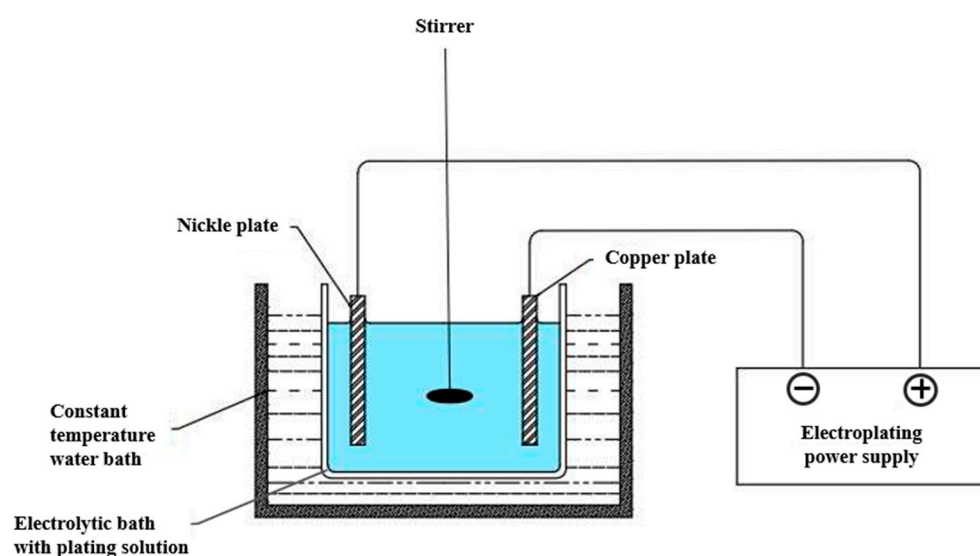

**Figure S1.** Diagram of electrodeposition experimental device.

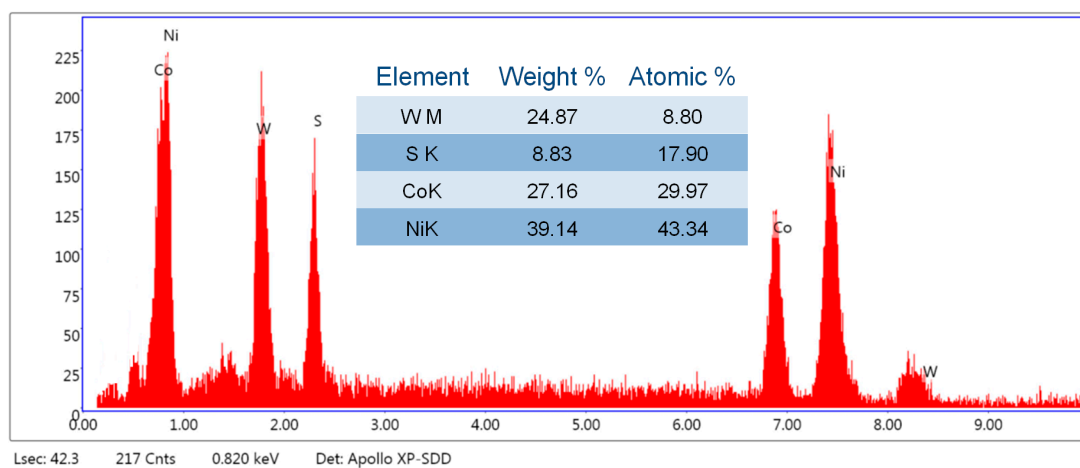

**Figure S2.** EDS spectrum of Ni-Co/WS<sub>2</sub> nanocomposite coating prepared by DC electrodeposition.

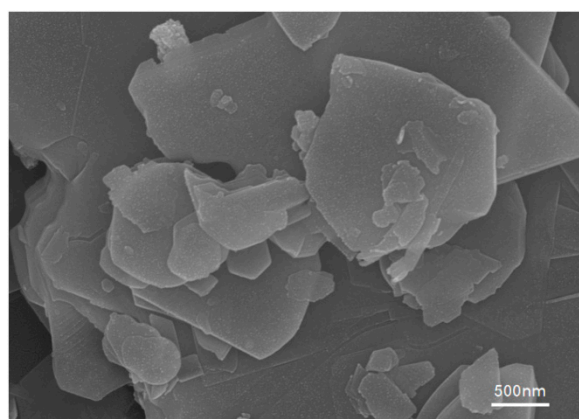

**Figure S3.** The SEM image of WS<sub>2</sub> nanoparticle.

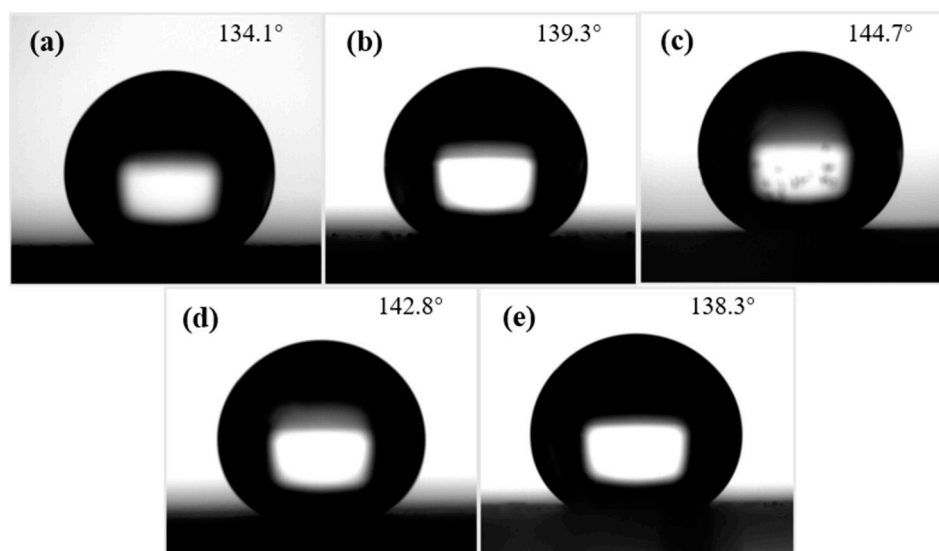

**Figure S4.** The WCA images of Ni-Co/WS<sub>2</sub> composite coatings prepared by DC electrodeposition, under different current density: (a) 1 A/dm<sup>2</sup>; (b) 2 A/dm<sup>2</sup>; (c) 3 A/dm<sup>2</sup>; (d) 4 A/dm<sup>2</sup>; (e) 5 A/dm<sup>2</sup>.

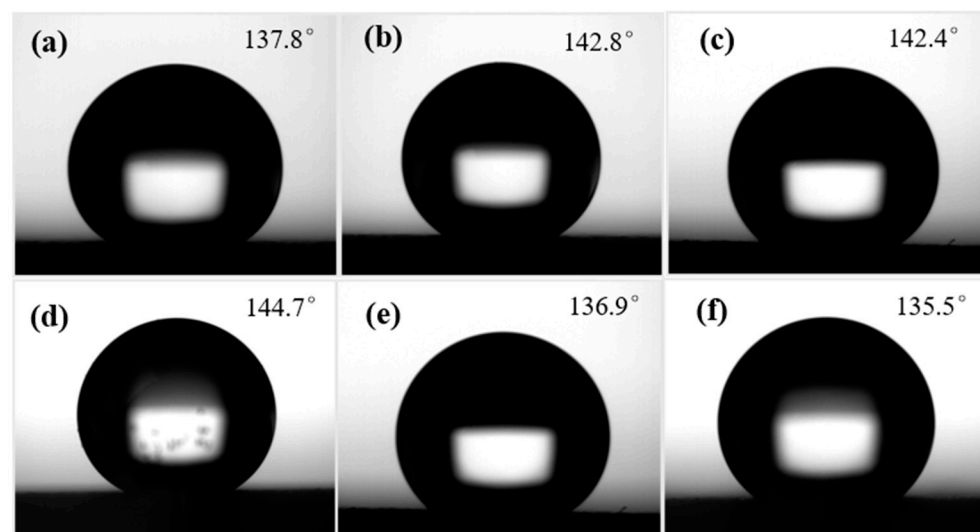

**Figure S5.** The WCA images of Ni-Co/WS<sub>2</sub> composite coatings prepared by DC electrodeposition, under different electrodeposition time: (a) 20 min; (b) 30 min; (c) 40 min; (d) 50 min; (e) 60 min; (f) 70 min.

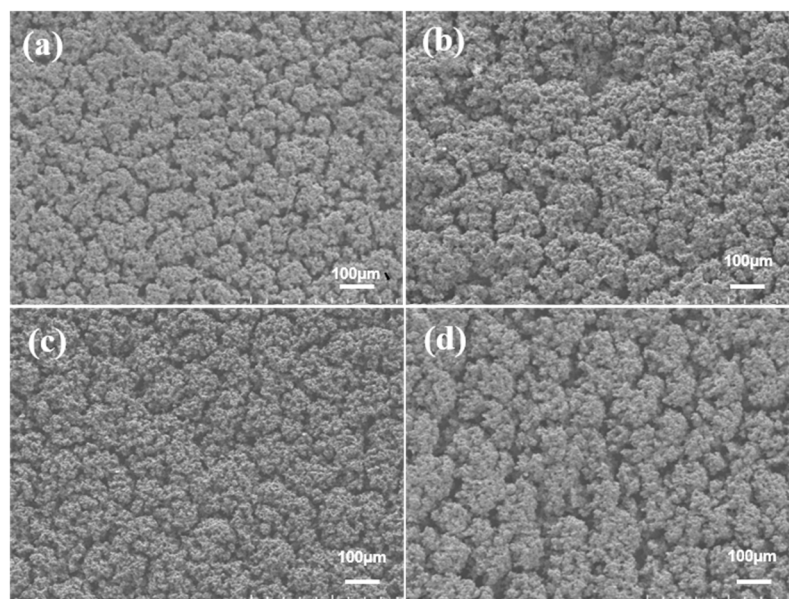

**Figure S6.** SEM images of the Ni-Co/WS<sub>2</sub> composite coatings prepared at different pulse duty cycles: (a)  $\gamma$ : 30%; (b)  $\gamma$ : 50%; (c)  $\gamma$ : 70%; (d)  $\gamma$ : 90%.

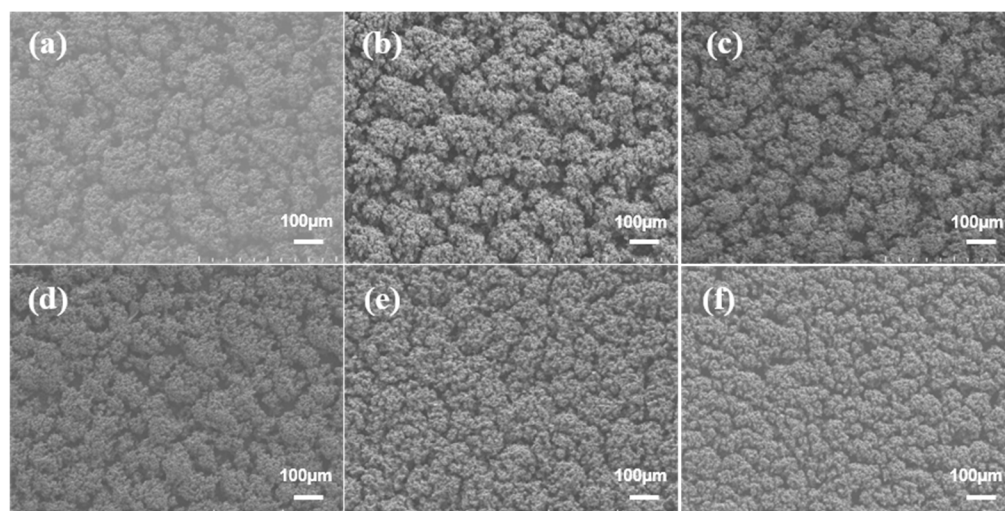

**Figure S7.** SEM images of the Ni-Co/WS<sub>2</sub> composite coatings prepared at different pulse frequencies: (a) 50 Hz; (b) 100 Hz; (c) 200 Hz; (d) 500 Hz; (e) 1000 Hz; (f) 1250 Hz.

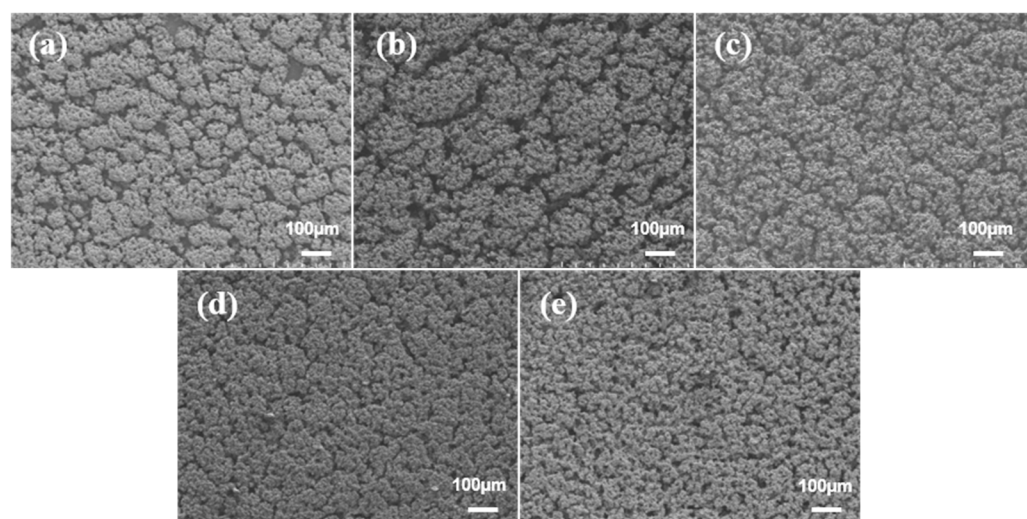

---

**Figure S8.** SEM images of the Ni-Co/WS<sub>2</sub> composite coatings prepared at different current densities by PC electrodeposition: **(a)** 1 A/dm<sup>2</sup>; **(b)** 2 A/dm<sup>2</sup>; **(c)** 3 A/dm<sup>2</sup>; **(d)** 4 A/dm<sup>2</sup>; **(e)** 5 A/dm<sup>2</sup>.
